# Supplementary material for: Metabolomic profiling of cannabis use and cannabis intoxication in humans
Source: Springer Nature journal article supplement (doi:10.1038/s41386-025-02082-7), 2025-03-12

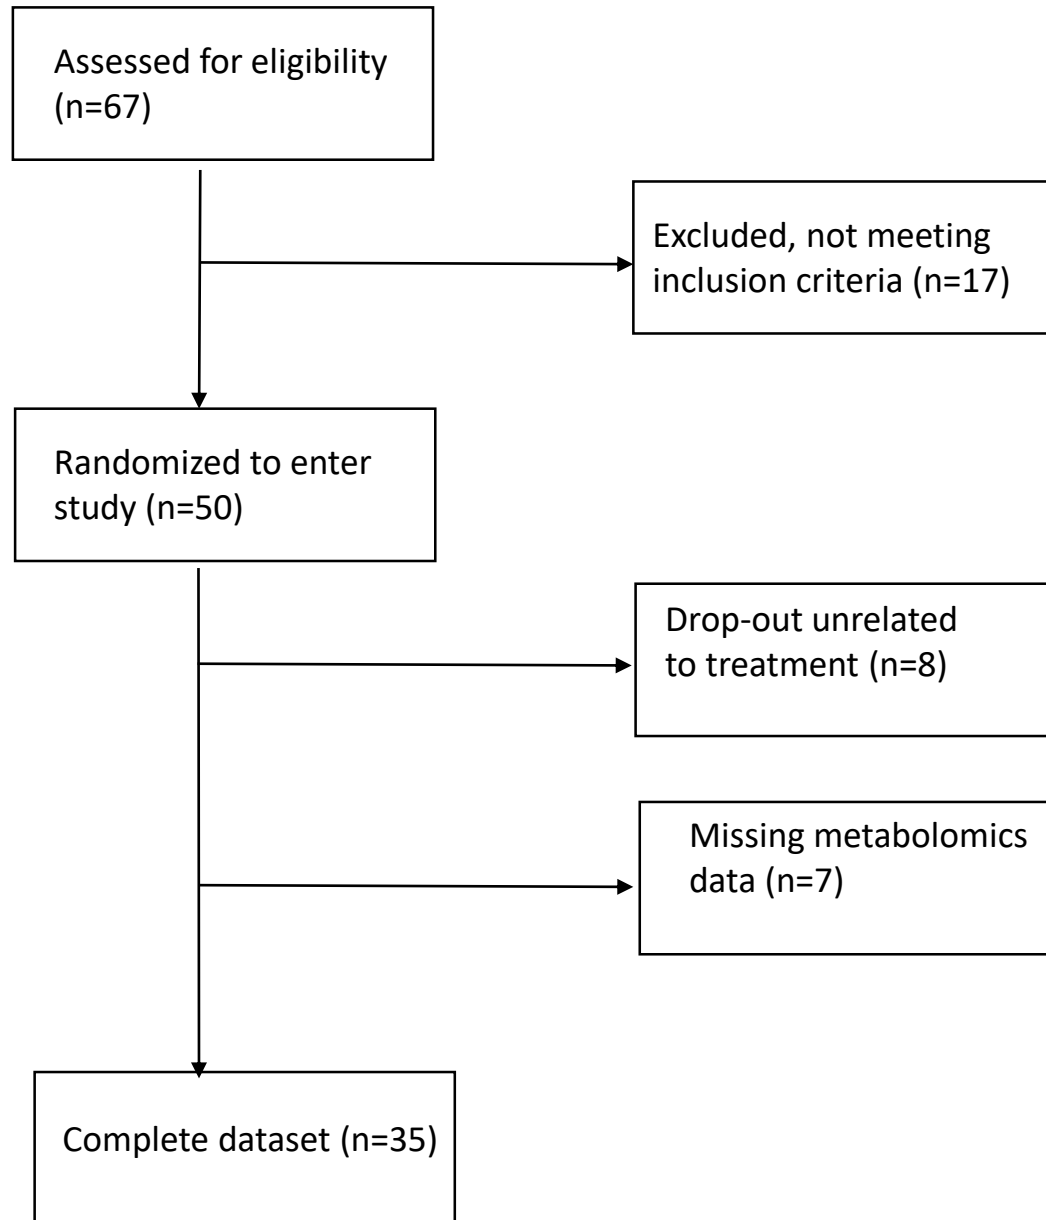

Supplement: MOESM2 [file 41386_2025_2082_MOESM2_ESM.pdf]
